# Supplementary material for: Differential regulation of the hmsCDE operon in Yersinia pestis and Yersinia pseudotuberculosis by the Rcs phosphorelay system
Source: PubMed Central journal article supplement (PMC4325325; doi:10.1038/srep08412), 2015-02-12
Supplement: srep08412-s1.pdf [file srep08412-s1.pdf]

Differential regulation of the *hmsCDE* operon in *Yersinia pestis* and *Yersinia pseudotuberculosis*

by the Rcs phosphorelay system

Xiao-Peng Guo<sup>1,2</sup>, Gai-Xian Ren<sup>1,2</sup>, Hui Zhu<sup>1</sup>, Xu-Jian Mao<sup>1</sup>, Yi-Cheng Sun<sup>1\*</sup>

<sup>1</sup>MOH key laboratory of Systems Biology of Pathogens, Institute of Pathogen Biology, Chinese

Academy of Medical Sciences and Peking Union Medical College, 9, Dongdan Santiao,

Dongcheng District, Beijing, 100730, China.

<sup>2</sup>These authors contribute equally to this work.

\*Corresponding author: Yi-Cheng Sun.

email: [sunyc@ipbcams.ac.cn](mailto:sunyc@ipbcams.ac.cn); phone: 86 10 6783 7366

## Supplementary Tables

Supplementary Table S1: Strains and plasmids used in this study

| Strain or plasmid            | Genotype and/ or description                                                 | Reference or source |
|------------------------------|------------------------------------------------------------------------------|---------------------|
| <i>Y. pestis</i>             |                                                                              |                     |
| KIM6+                        | wild type (pCD1-), nonfunctional <i>rcaA</i>                                 | 1                   |
| CDY326                       | $\Delta rcsB::Km$                                                            | 2                   |
| SY591                        | $\Delta hmsCDE$                                                              | This study          |
| SY1567                       | $\Delta rcsD$ -N-terminal, <i>hmsD</i> -Myc <sub>2</sub>                     | This study          |
| SY1568                       | $\Delta rcsB::Km$ , <i>hmsD</i> -Myc <sub>2</sub>                            | This study          |
| SY1570                       | <i>hmsD</i> -Myc <sub>2</sub>                                                | This study          |
| SY1615                       | <i>hmsD</i> -Myc <sub>2</sub> , RcsXXX <sup>a</sup>                          | This study          |
| SY1726                       | functional <i>rcaA</i> , <i>hmsD</i> -Myc <sub>2</sub>                       | This study          |
| SY1783                       | functional <i>rcaA</i> , <i>hmsD</i> -Myc <sub>2</sub> , RcsXXX              | This study          |
| SY1784                       | functional <i>rcaA</i> , <i>hmsD</i> -Myc <sub>2</sub> , RcsABX <sup>b</sup> | This study          |
| SY1785                       | <i>hmsD</i> -Myc <sub>2</sub> , RcsXAB <sup>c</sup>                          | This study          |
| SY1786                       | <i>hmsD</i> -Myc <sub>2</sub> , RcsABX                                       | This study          |
| SY1788                       | $\Delta rcsB::Km$ , <i>hmsD</i> -Myc <sub>2</sub> , RcsXXX                   | This study          |
| SY1790                       | $\Delta rcsB::Km$ , <i>hmsD</i> -Myc <sub>2</sub> , RcsABX                   | This study          |
| SY1856                       | functional <i>rcaA</i> , <i>hmsD</i> -Myc <sub>2</sub> , RcsXXX <sup>d</sup> | This study          |
| SY1860                       | <i>hmsD</i> -Myc <sub>2</sub> , RcsXXX                                       | This study          |
| SY1861                       | $\Delta rcsB::Km$ , <i>hmsD</i> -Myc <sub>2</sub> , RcsXXX                   | This study          |
| SY1910                       | $\Delta rcsB::Km$ , <i>hmsD</i> -Myc <sub>2</sub> , RcsXAB                   | This study          |
| SY1911                       | functional <i>rcaA</i> , <i>hmsD</i> -Myc <sub>2</sub> , RcsXAB              | This study          |
| <i>Y. pseudotuberculosis</i> |                                                                              |                     |
| IP32953                      | wild type; serogroup O1                                                      | 3                   |
| CDY331                       | nonfunctional <i>rcaA</i>                                                    | 2                   |

|        |                                                                                                        |            |
|--------|--------------------------------------------------------------------------------------------------------|------------|
| SY1798 | <i>hmsD</i> -Myc <sub>2</sub>                                                                          | This study |
| SY1799 | nonfunctional <i>rcsA</i> , <i>hmsD</i> -Myc <sub>2</sub>                                              | This study |
| SY1937 | $\Delta$ <i>rcsB</i> :: <i>Km</i> , <i>hmsD</i> -Myc <sub>2</sub>                                      | This study |
| SY1939 | nonfunctional <i>rcsA</i> , <i>hmsD</i> -Myc <sub>2</sub>                                              | This study |
| SY1966 | <i>hmsD</i> -Myc <sub>2</sub> , RcsAXX                                                                 | This study |
| SY1967 | nonfunctional <i>rcsA</i> , <i>hmsD</i> -Myc <sub>2</sub> , RcsAXX                                     | This study |
| SY1968 | $\Delta$ <i>rcsB</i> :: <i>Km</i> , <i>hmsD</i> -Myc <sub>2</sub> , RcsAXX                             | This study |
| SY1969 | $\Delta$ <i>rcsB</i> :: <i>Km</i> , nonfunctional <i>rcsA</i> , <i>hmsD</i> -Myc <sub>2</sub> , RcsAXX | This study |

#### Plasmids

|               |                                                                            |            |
|---------------|----------------------------------------------------------------------------|------------|
| pBAD/ Myc-His | expression vector, araBAD promoter, Amp <sup>R</sup>                       | Invitrogen |
| pUC19         | cloning vector for PCR products, Amp <sup>R</sup>                          | 4          |
| pGD926        | <i>lacZ</i> translational fusion vector, Tet <sup>R</sup>                  | 5          |
| pVTRA         | low level expression plasmid, IPTG induced, Cat <sup>R</sup>               | 6          |
| pCBD179       | functional <i>rcsA</i> in pUC18                                            | 2          |
| pCBD209       | <i>rcsB</i> in pBAD/ Myc-His                                               | 7          |
| pYC287        | <i>hmsC</i> 5' UTR:: <i>lacZ</i> fusion in pGD926                          | This study |
| pYC300        | <i>hmsC</i> 5' UTR (RcsAXX):: <i>lacZ</i> fusion in pGD926                 | This study |
| pYC301        | <i>hmsC</i> 5' UTR (-10 box* <sup>e</sup> ):: <i>lacZ</i> fusion in pGD926 | This study |
| pYC332        | <i>rcsB</i> in pUC19                                                       | This study |
| pYC484        | <i>hmsC</i> 5' UTR (RcsXXX):: <i>lacZ</i> fusion in pGD926                 | This study |
| pYC485        | <i>hmsC</i> 5' UTR (RcsXAB):: <i>lacZ</i> fusion in pGD926                 | This study |
| pYC486        | <i>hmsC</i> 5' UTR (RcsABX):: <i>lacZ</i> fusion in pGD926                 | This study |
| pYC487        | <i>hmsC</i> :: <i>lacZ</i> fusion in pGD926                                | This study |
| pYC513        | <i>hmsCDE</i> in pVTRA                                                     | This study |
| PYC575        | <i>rcsB</i> ( D56Q) in pUC19                                               | This study |
| PYC576        | <i>rcsB</i> ( D56E) in pUC19                                               | This study |
| PYC593        | <i>hmsT</i> 5' UTR:: <i>lacZ</i> fusion in pGD926                          | This study |
| PYC597        | <i>lcrQ</i> 5' UTR:: <i>lacZ</i> fusion in pGD926                          | This study |

<sup>a</sup>RcsAXX: RcsAAB mutation showed as Figure 3: TAAGATTT**TCTGTTTCGCTTTT** (the mutated base pairs are bold, the same below).

<sup>b</sup>RcsABX: RcsAAB mutation showed as Figure 3: TAAGATAAATCTC**ACGCTTTT**

<sup>c</sup>RcsXAB: RcsAAB mutation showed as Figure 3: **CTTTCTG**TAAGATAAATCTCA

<sup>d</sup>RcsXXX: RcsAAB mutation showed as Figure 3: **CTTTCTGTCTGTTTCGCTTTT**

<sup>e</sup>-10 box\*: -10 box mutation of *hmsC* promoter.

---

Supplementary Table S2: Oligonucleotides used in this study

---

**Construction of *rcsB* in pUC19 (pYC332)**

cgggatccatttaagcagcgcgggtat  
ggaattctactacagtaccaagtacggcg

**Construction of *lacZ* deletion**

atgacgtcacaggaaaaggtaccactccaggtgcaactgagtcttgtgtaggctggagctgcttcg  
ttacacctgtattgccaacagatttggtactgataggttcacgatatgaatcctccttag

**Construction of *hmsC* 5' UTR::*lacZ* fusion in pGD926 (pYC287)**

cccaagcttgccagcccagctccg  
cgggatccgcgcaagtagcggtagtc

**Construction of *hmsC*::*lacZ* fusion in pGD926 (pYC487)**

cccaagcttatgactaccgctacttgcg  
cgggatcctgatttttttcggttcat

**Construction of *hmsT* 5' UTR::*lacZ* fusion in pGD926 (pYC593)**

caagcttcacggctgagcaaccggg  
cgcggatccatattcaatttactctgca

**Construction of *lcrQ* 5' UTR::*lacZ* fusion in pGD926 (pYC597)**

ccaagcttgcgtttggatcaaggggg  
cgcggatcctgaagagtattgatttcatcg

**Determination of *hmsC* transcription start site**

attctggcagcagcatcgctacgttcacgc  
gcattgatattactggcggccaataatggggttggtac  
agccaccaataatgaaagtaa  
cgacgttattataagatttatatga

**PCR amplification of *hmsC* promoter for EMSA**

tacctgacaaaaaccggaaa  
tgatgtaataatagtcatatcatcgt

**PCR amplification of *hmsT* promoter for EMSA**

tcatgatgacaggctgaaaca  
tccgacatcacgacaaataaa

**PCR amplification of *lcrQ* promoter for EMSA**

ccccaaaaataatttttattgtgatt  
tataattgtctctacgatattctaagttattatt

### **RcsB (D56Q) mutagenesis**

aattactcaactctctatgccaggggataagtatggtgatggcatcac  
agagttgagtaattagcacgttggcatcaagttggacaaattgtaataagc

### **RcsB (D56E) mutagenesis**

aattactgaactctctatgccaggggataagtatggtgatggcatcac  
agagttcagtaattagcacgttggcatcaagttggacaaattgtaataagc

### **RcsXXX box mutagenesis**

tctgttcgcttttaatttacgatgatgactattattacatcatataaatcttataataacg  
aaaagcgaaacagaaatcttattatgttattgaaatagaatataaaaaacccga

### **RcsXXX box mutagenesis**

ctttctgtctgttcgcttttaatttacgatgatgactattattacatcatataaatcttataataacg  
aaaagcgaaacagacagaaagttatgttattgaaatagaatataaaaaacccgactgtt

### **RcsXAB box mutagenesis**

ctttctgtaagataaatctcaatttacgatgatgactattattacatcatataaatcttataataacg  
tgagattatctacagaaagttatgttattgaaatagaatataaaaaacccgactgtt

### **RcsABX box mutagenesis**

aatctcacgcttttaatttacgatgatgactattattacatcatataaatcttataataacg  
aaaagcgtgagattaatcttattatgttattgaaatagaatataaaaaacccga

### **-10 box mutagenesis**

ttaggtacagcgttagatctagatttatgatgaataatagtcatatcatcgtaaattaagatctttctgtc  
agatctaacgtcgtacctaacgccgattcaaccaccacattta

### ***hmsD* qRT-PCR**

acctgcatttgatgccccg36-TAMSp  
gccttacgggtttatgttgatcac  
ggcctcgggtgataactgatg

### ***crr* qRT-PCR**

ctcctgttgacggcaccatcgg36-TAMSp  
gccctctggcaataaaatgg  
agcatggtgtctcgaat

---

All sequences are in 5'→3' orientation.

---

## Supplementary Figures

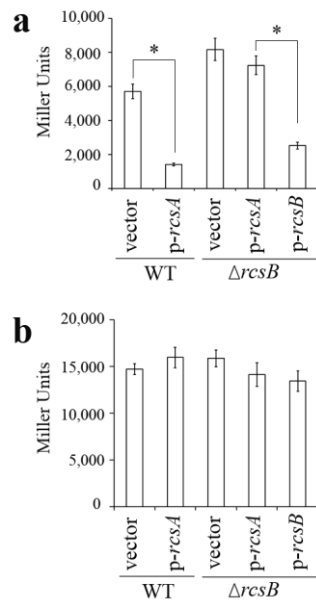

Supplementary Figure S1:  $\beta$ -galactosidase activities of *hmsT::lacZ* and *lcrQ::lacZ* reporter.

$\beta$ -galactosidase activities of *hmsT::lacZ* (a) and *lcrQ::lacZ* (b) reporter in *Y. pestis*. *Y. pestis* KIM6+ (WT) transformed with empty vector (vector) and functional RcsA (p-rcsA), RcsB deletion mutant transformed with empty vector (vector), wild-type RcsA (p-rcsA) and wild-type RcsB (p-rcsB). The mean and standard deviation of three independent experiments with three replicates are indicated. \* $P < 0.01$ .

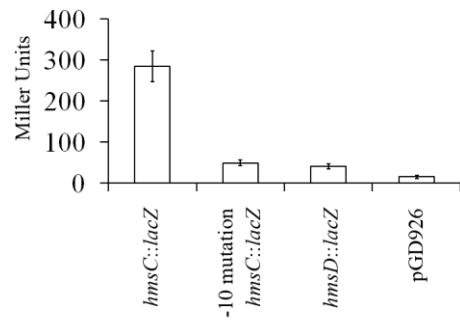

Supplementary Figure S2:  $\beta$ -galactosidase activities of *hmsC::lacZ* and *hmsD::lacZ* reporters.

$\beta$ -galactosidase activities of *hmsC::lacZ* and *hmsD::lacZ* reporters in *Y. pestis*. KIM6+ (WT) transformed with *hmsC::lacZ*, *hmsC::lacZ* with mutated putative -10 box, *hmsD::lacZ* and pGD926 plasmids. The mean and standard deviation of three independent experiments with three replicates are indicated. \* $P < 0.05$ , \*\* $P < 0.01$ .



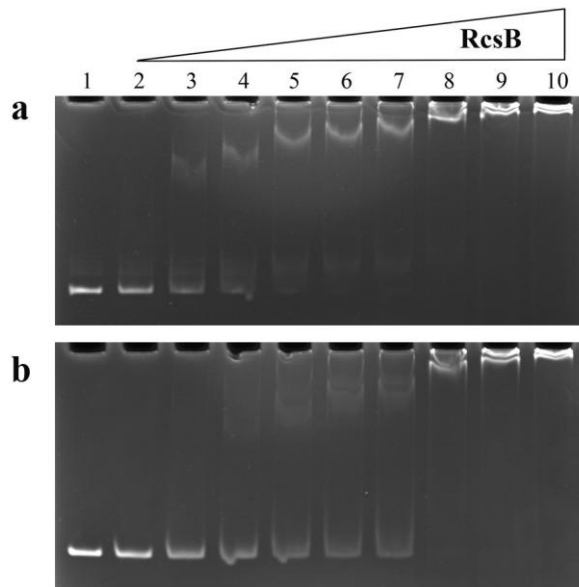

Supplementary Figure S3: EMSA results of RcsB with *hmsT* and *lcrQ* promoter.

Electrophoretic mobility shift assays (EMSA) of *hmsT* (a) and *lcrQ* (b) promoter DNA incubated with increasing concentrations of RcsB. Probes were tested with identical protein combinations. Lane 1, probe alone; lanes 2-10, 100 ng probe with 400, 800, 1200, 1600, 2000, 2400, 4000, 6000 or 8000 ng of RcsB in the 16  $\mu$ L reaction.

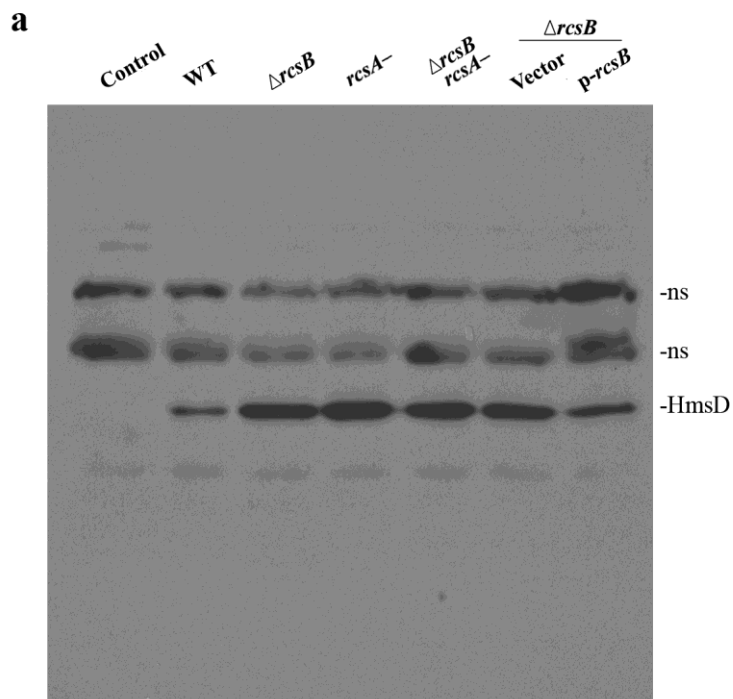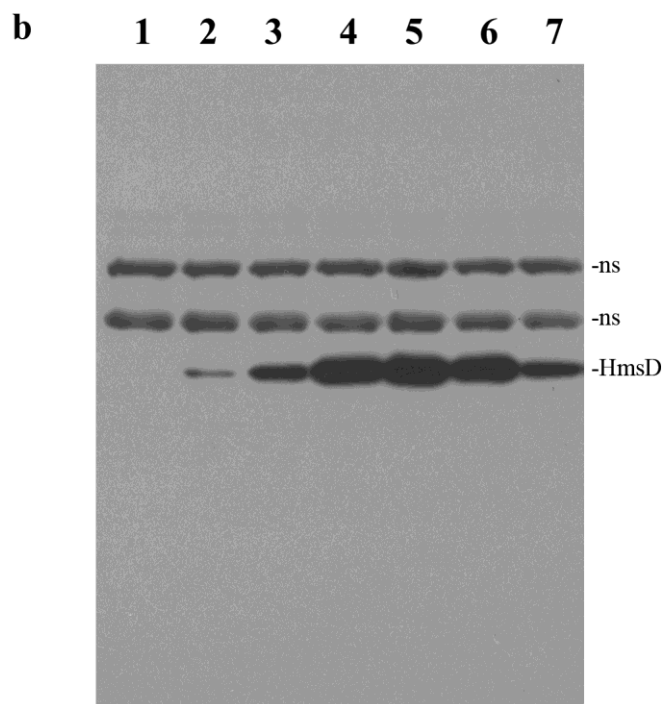

Supplementary Figure S4: Role of the RcsAAB box on regulation of expression of HmsD by Rcs in *Y. pseudotuberculosis*. Western blots of total protein-matched lysates prepared from cells with (a) RcsAAB box and (b) RcsAAX box were analyzed by anti-Myc antibody. Strain designations (Supplementary Table S1) are: (a) Control, IP32953; WT, *hmsD*-Myc<sub>2</sub>;  $\Delta rcsB$ ,

$\Delta rcsB$  *hmsD*-Myc<sub>2</sub>; *rcsA*<sup>-</sup>, nonfunctional *rcsA* *hmsD*-Myc<sub>2</sub>;  $\Delta rcsB$  *rcsA*<sup>-</sup>, nonfunctional *rcsA*  
 $\Delta rcsB$  *hmsD*-Myc<sub>2</sub>;  $\Delta rcsB$  Vector,  $\Delta rcsB$  *hmsD*-Myc<sub>2</sub>/ pUC19;  $\Delta rcsB$  p-*rcsB*,  $\Delta rcsB$   
*hmsD*-Myc<sub>2</sub>/ pYC332.

(b) 1, IP32953; 2, *hmsD*-Myc<sub>2</sub>; 3, RcsA<sup>XX</sup> mutation, *hmsD*-Myc<sub>2</sub>; 4, nonfunctional *rcsA*,  
RcsA<sup>XX</sup> mutation, *hmsD*-Myc<sub>2</sub>; 5,  $\Delta rcsB$ , RcsA<sup>XX</sup> mutation, *hmsD*-Myc<sub>2</sub>; 6,  $\Delta rcsB$ ,  
RcsA<sup>XX</sup> mutation, *hmsD*-Myc<sub>2</sub>/ pUC19; 7,  $\Delta rcsB$ , RcsA<sup>XX</sup> mutation, *hmsD*-Myc<sub>2</sub>/ pYC332.  
pYC332: p-*rcsB*.

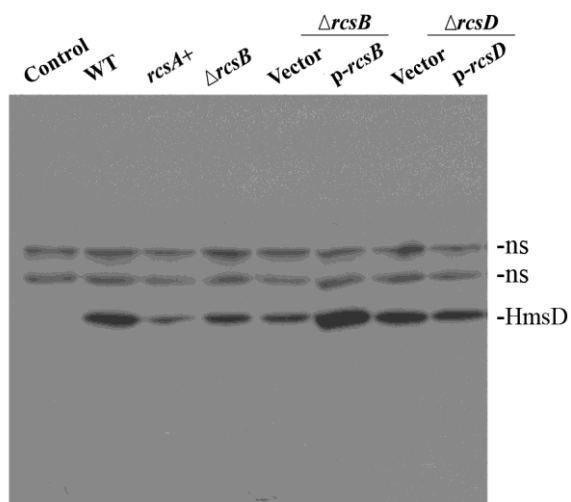

Supplementary Figure S5: Full-length blots for Figure 1c.

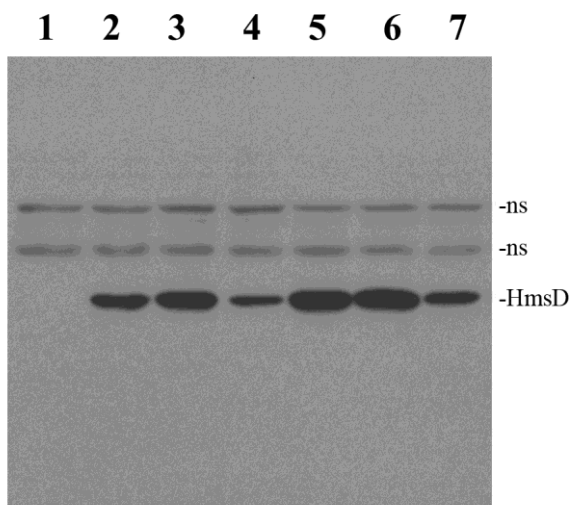

Supplementary Figure S6: Full-length blots for Figure 5a.

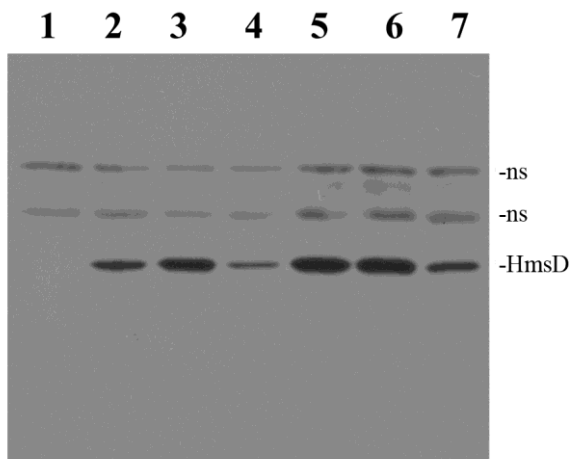

Supplementary Figure S7: Full-length blots for Figure 5b.

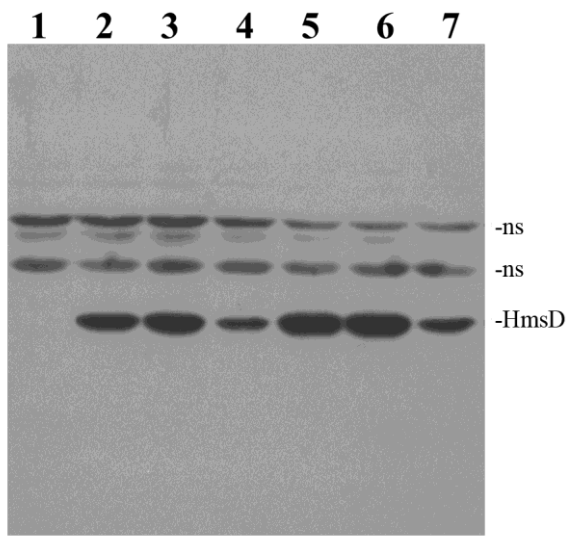

Supplementary Figure S8: Full-length blots for Figure 5c.

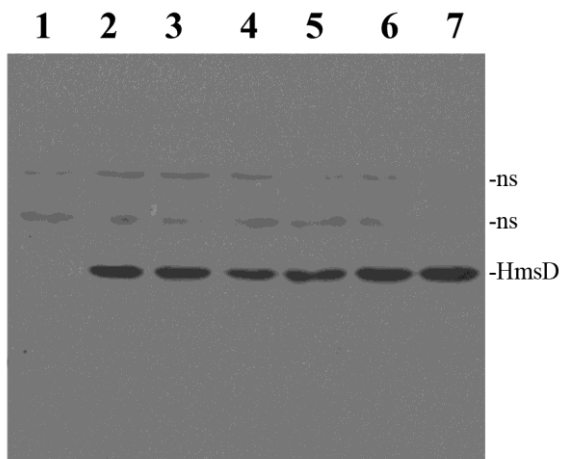

Supplementary Figure S9: Full-length blots for Figure 5d.



## Supplementary References

- 1 Fetherston, J. D., Schuetze, P. & Perry, R. D. Loss of the pigmentation phenotype in *Yersinia pestis* is due to the spontaneous deletion of 102 kb of chromosomal DNA which is flanked by a repetitive element. *Mol. Microbiol.* **6**, 2693-2704 (1992).
- 2 Sun, Y. C., Hinnebusch, B. J. & Darby, C. Experimental evidence for negative selection in the evolution of a *Yersinia pestis* pseudogene. *Proc. Natl. Acad. Sci. U S A.* **105**, 8097-8101 (2008).
- 3 Chain, P. S. *et al.* Insights into the evolution of *Yersinia pestis* through whole-genome comparison with *Yersinia pseudotuberculosis*. *Proc. Natl. Acad. Sci. U S A.* **101**, 13826-13831 (2004).
- 4 Yanisch-Perron, C., Vieira, J. & Messing, J. Improved M13 phage cloning vectors and host strains: nucleotide sequences of the M13mp18 and pUC19 vectors. *Gene* **33**, 103-119 (1985).
- 5 Ditta, G. *et al.* Plasmids related to the broad host range vector, pRK290, useful for gene cloning and for monitoring gene expression. *Plasmid* **13**, 149-153 (1985).
- 6 Perez-Martin, J. & Lorenzo, V. D. VTR expression cassettes for engineering conditional phenotypes in *Pseudomonas*: activity of the Pu promoter of the TOL plasmid under limiting concentrations of the XylR activator protein. *Gene* **172**, 81-86 (1996).
- 7 Sun, Y. C., Guo, X. P., Hinnebusch, B. J. & Darby, C. The *Yersinia pestis* Rcs phosphorelay inhibits biofilm formation by repressing transcription of the diguanylate cyclase gene *hmsT*. *J. Bacteriol.* **194**, 2020-2026 (2012).
